# Supplementary material for: Fluorescence-Based Analysis of Noncanonical Functions of Aminoacyl-tRNA Synthetase-Interacting Multifunctional Proteins (AIMPs) in Peripheral Nerves
Source: PubMed Central journal article supplement (PMC6480683; doi:10.3390/ma12071064), 2019-04-01
Supplement: materials-12-01064-s001.pdf [file materials-12-01064-s001.pdf]

# Supplementary Materials: Fluorescence-Based Analysis of Noncanonical Functions of Aminoacyl-tRNA Synthetase-Interacting Multifunctional Proteins (AIMPs) in Peripheral Nerves

Muwoong Kim <sup>1</sup>, Hyosun Kim <sup>1,2</sup>, Dokyoung Kim <sup>1</sup>, Chan Park <sup>1</sup>, Youngbuhm Huh <sup>1</sup>, Junyang Jung <sup>1,\*</sup>, Hyung-Joo Chung <sup>3,\*</sup> and Na Young Jeong <sup>4,\*</sup>

<sup>1</sup> Department of Anatomy and Neurobiology, College of Medicine, Kyung Hee University, 26, Kyungheedaero, Dongdaemun-gu, Seoul 02447, Korea; qltnsd19@khu.ac.kr (M.K.); hoysun0407@khu.ac.kr (H.K.); dkim@khu.ac.kr (D.K.); psychan@khu.ac.kr (C.P.); ybhuh@khu.ac.kr (Y.H.)

<sup>2</sup> Department of Biomedical Science, Medical Research Center for Bioreaction to Reactive Oxygen Species and Biomedical Science Institute, Graduation School, Kyung Hee University, 26, Kyungheedaero, Dongdaemun-gu, Seoul 02447, Korea

<sup>3</sup> Department of Anesthesiology and Pain Medicine, College of Medicine, Kosin University, 262, Gamcheon-ro, Seo-gu, Busan 49267, Korea

<sup>4</sup> Department of Anatomy and Cell Biology, College of Medicine, Dong-A University, 32, Daesingongwon-ro, Seo-gu, Busan 49201, Korea

\* Correspondence: jjung@khu.ac.kr (J.J.); dmadjejs@naver.com (H.-J.C.); jnyjy@dau.ac.kr (N.Y.J.)

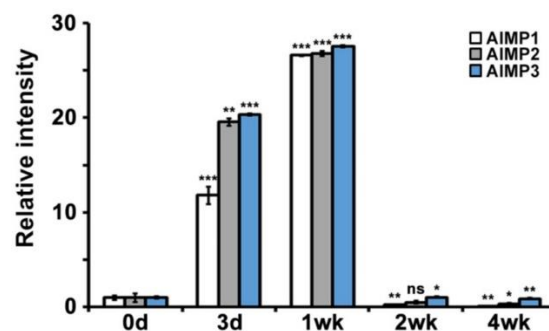

**Figure S1.** Relative intensities of mRNA expressions of aminoacyl-tRNA synthetase-interacting multifunctional proteins (AIMPs) using semi-PCR analysis were calculated by fold change. Fold changes of postinjury samples (3 days, 1 week, 2 weeks, 4 weeks) were derived by mRNA expression level of each sample divided by that of control (non-injured nerves) ( $n = 3$ , \*  $p < 0.05$ , \*\*  $p < 0.01$ , \*\*\*  $p < 0.001$ , ns;  $p > 0.05$ ). Glyceraldehyde-3-phosphate dehydrogenase (GAPDH) was used as loading control.

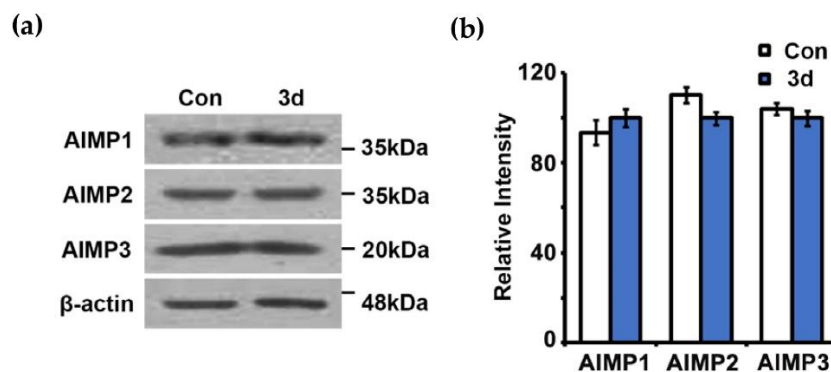

**Figure S2.** After peripheral nerve injury, there was no significant change of AIMPs expression in ventral horn of spinal cord. (a) 3 days after sciatic nerve injury, protein extracts (10  $\mu$ g) from the ventral horn of spinal cord were evaluated by western blot. (b) Quantification of relative intensity of

AIMPs protein levels. Protein expression was relatively measured in the ventral horn compared with samples at 3 days after nerve injury.
